# Supplementary material
Source: Springer Nature journal article supplement (https://www.springermedizin.de/resource/supplementary/12958_2011_958_MOESM1_ESM.pdf/9566464)

NPE

PCOSE-IR

A

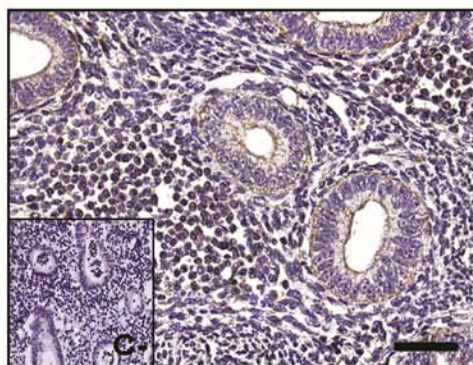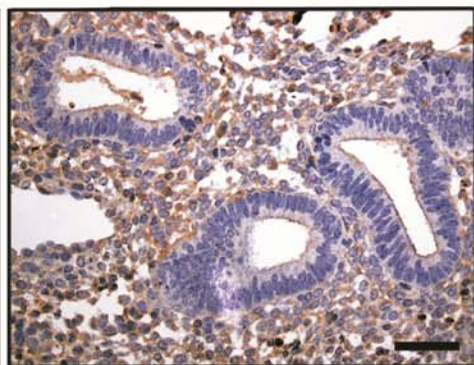

B

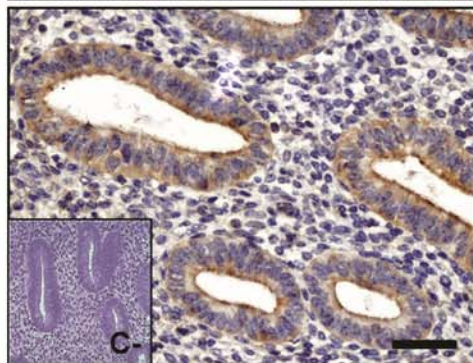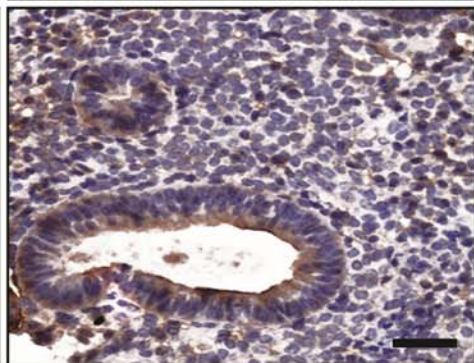

C

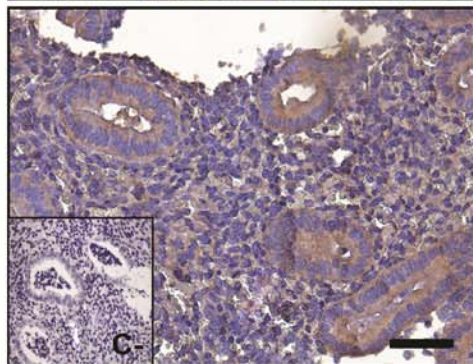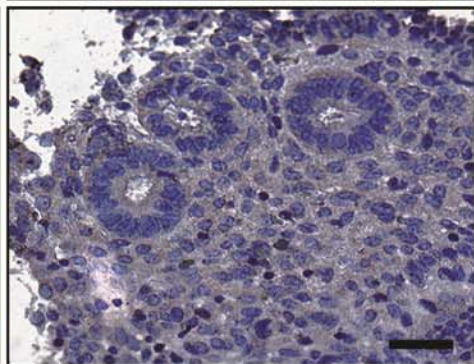

D

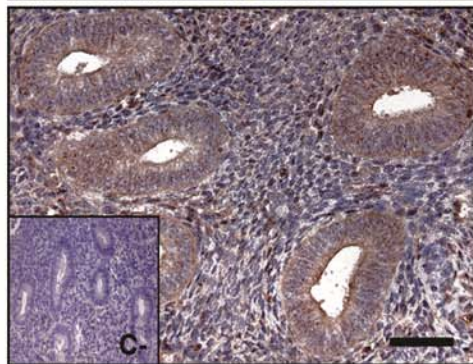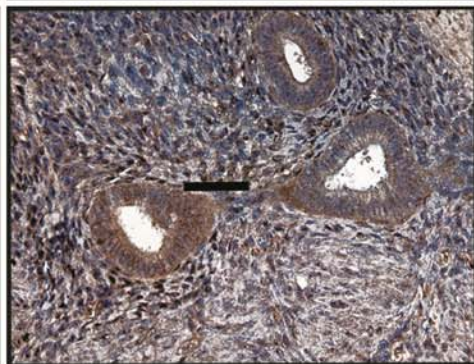

Supplement: MOESM1 [file 9566464]
